# Supplementary material
Source: publisher figshare collection journal article supplement (https://acs.figshare.com/ndownloader/files/4864399)
Supplement: Supplementary file 1 [file 4864399]

## Supporting Information

### Evaluation of PolyMPC-Dox Prodrugs in a Human Ovarian Tumor Model

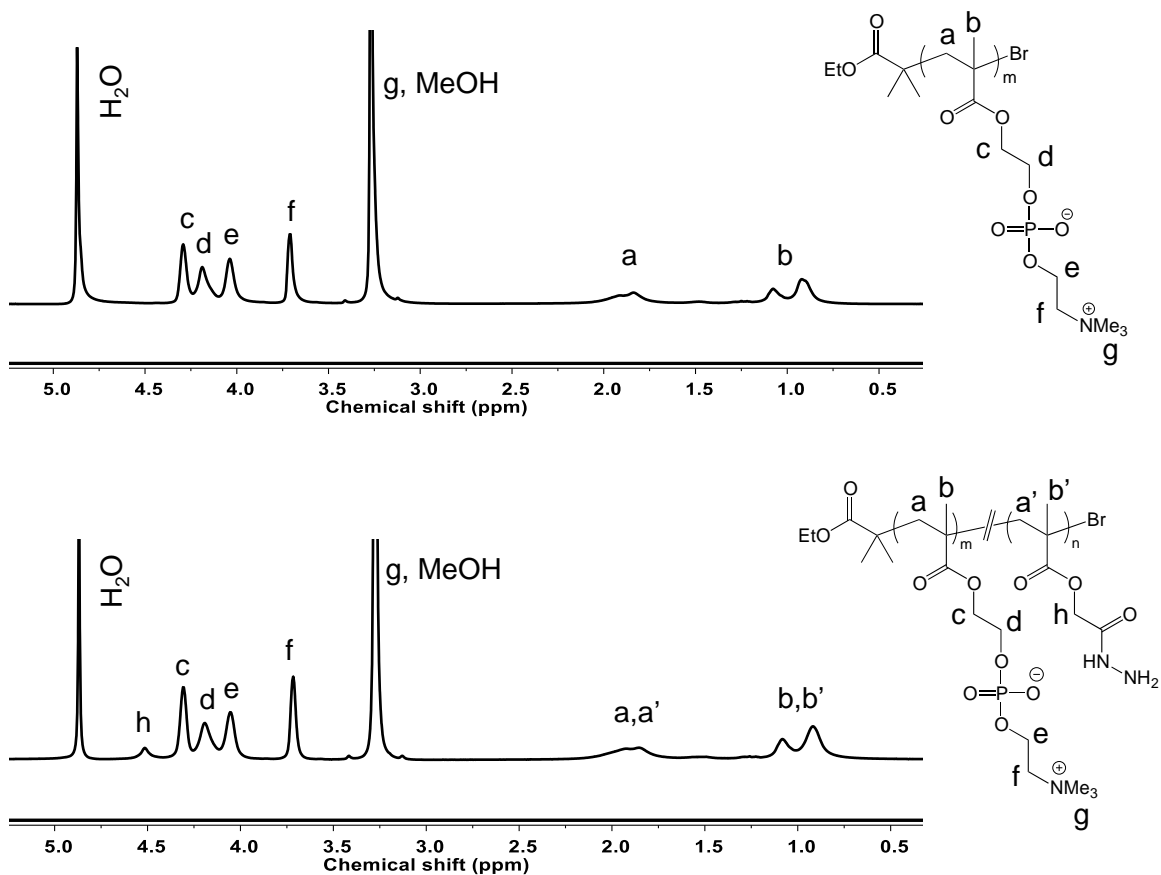

**Figure S1.**  $^1\text{H}$ -NMR (500 MHz) spectra of polymer **1** (top), and polymer **2** (bottom) in  $\text{MeOD-D}_4$ .

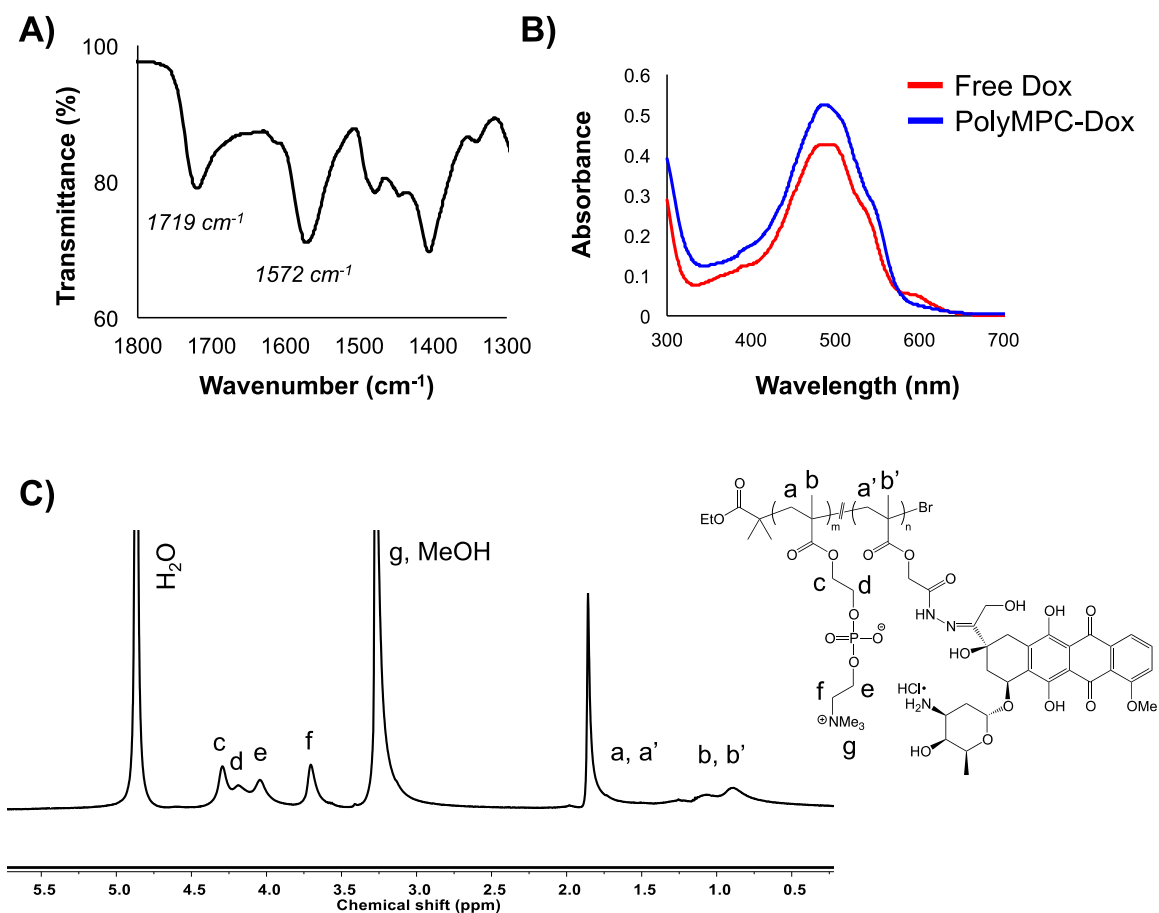

**Figure S2.** Spectroscopic characterization of polyMPC-Dox **3**: A) IR spectrum showing signals at  $1719$  and  $1572 \text{ cm}^{-1}$  for the  $\text{C}=\text{O}$  and  $\text{C}=\text{N}$  stretching of the methacrylate esters and hydrazones, respectively; B) UV-Vis absorbance spectra of free Dox ( $0.05 \text{ mg/ml}$ ) and **3** ( $0.25 \text{ mg/ml}$ ) in pure water; C)  $^1\text{H}$ -NMR ( $500 \text{ MHz}$ ) spectrum of **3** recorded in  $\text{MeOD-d}_4$ .

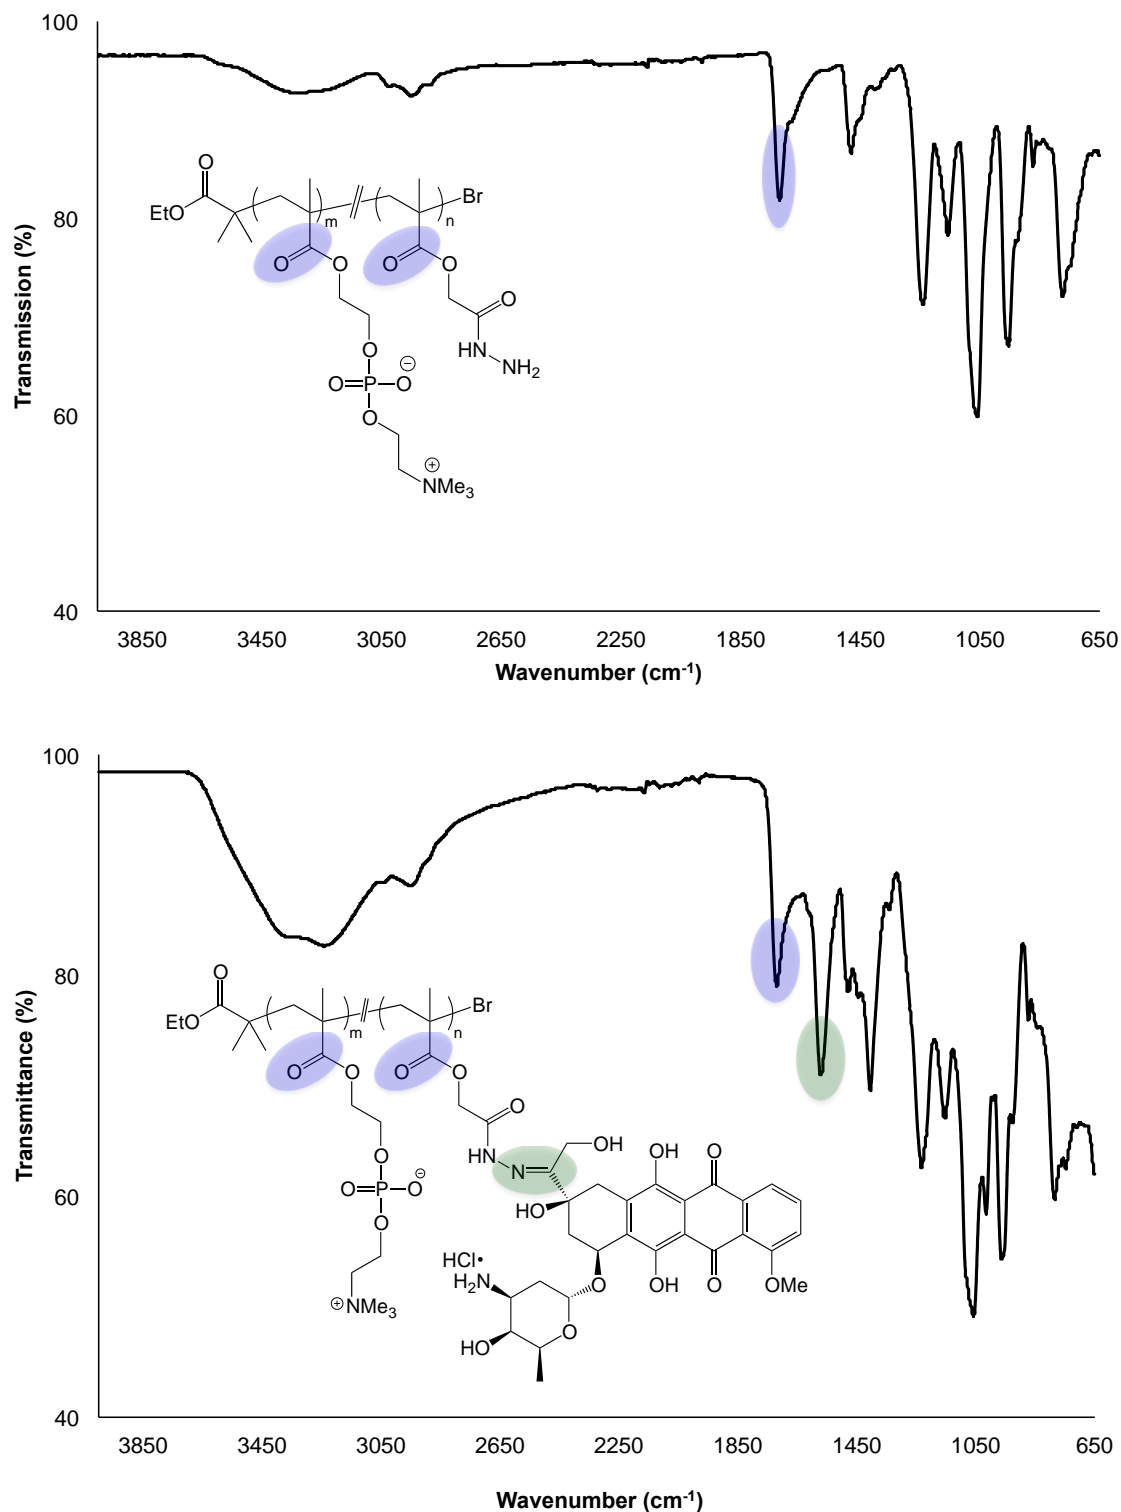

**Figure S3.** IR spectra of polymer **2** (top), and polyMPC-Dox **3** (bottom). Following Dox conjugation, a new peak in the IR spectrum of **3** at 1572 cm<sup>-1</sup> is observed that is attributed to the C=N stretching of hydrazone linkages.

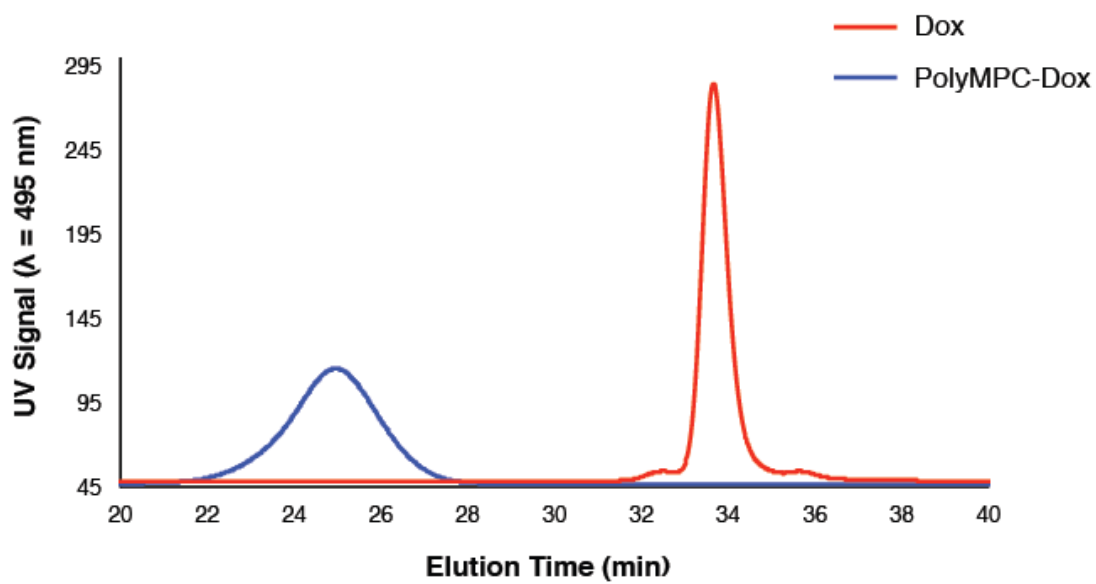

**Figure S4.** GPC chromatograms (eluting in trifluoroethanol) of Dox and polyMPC-Dox prodrug **3**. For prodrug **3**, a single polymer fraction was observed (24.8 minutes), with a notable absence of any residual Dox (33.6 minutes).

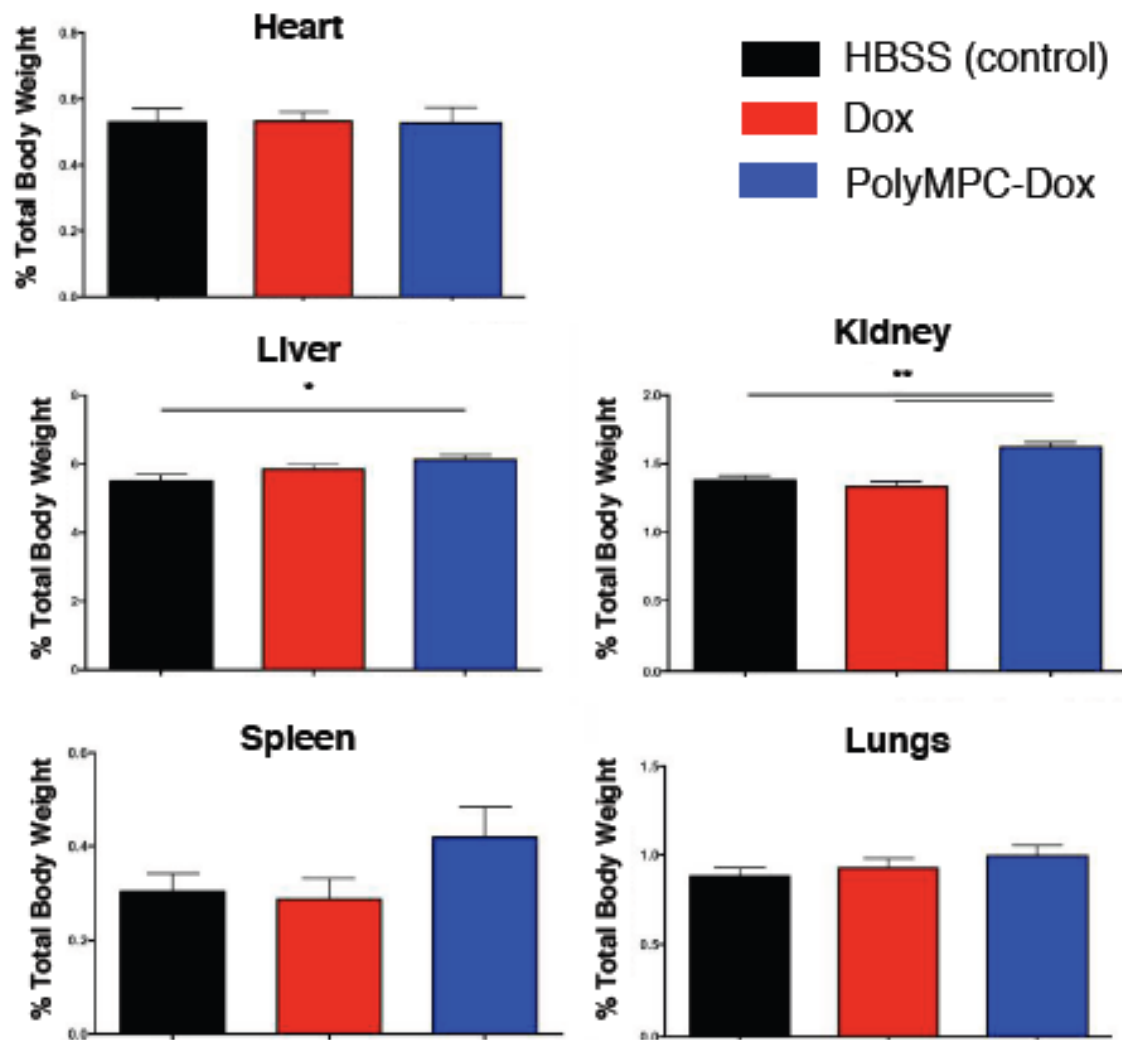

**Figures S5.** Proportional organ weights at time of euthanasia for NOD SCID mice, bearing subcutaneous SKOV-3 human ovarian tumors, treated with multiple administrations of HBSS (control), Dox (2 mg/kg), or polyMPC-Dox **3** (5 mg/kg Dox equivalent dose). \* and \*\* represent statistically significant differences at  $\alpha=0.05$  and  $\alpha=0.01$ , respectively. Error bars represent  $\pm$  SEM.
